# Supplementary material for: The design of drugs for HIV and HCV
Source: Springer Nature journal article supplement (doi:10.1038/nrd2424), 2007-11-30

S2 (figure) | **Etravirine positioned in the NNRTI-binding site of HIV-1 reverse transcriptase.** Figure reproduced with permission from REF. 10 © (2004) Elsevier.

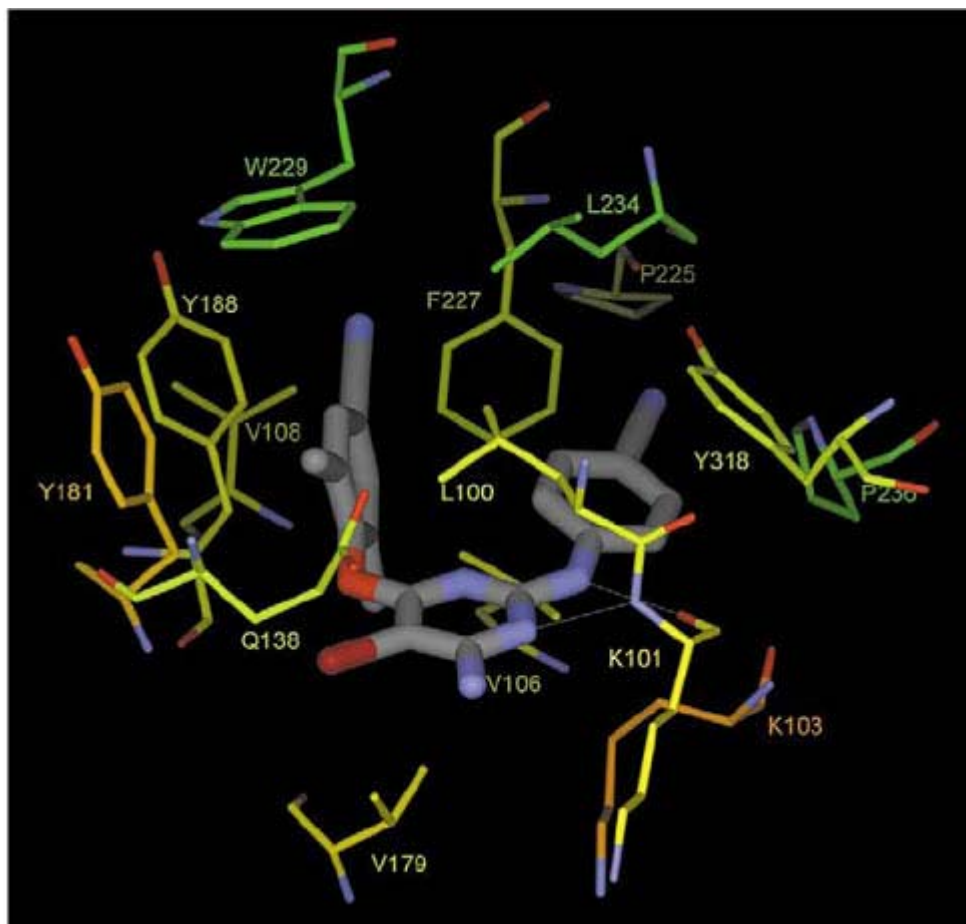

Supplement: nrd2424-s2.pdf [file nrd2424-s2.pdf]
